# Supplementary material for: A general synthesis of abundant metal nanoparticles functionalized mesoporous graphitized carbon
Source: Royal Society of Chemistry journal article supplement (doi:10.1039/c7ra09560k), 2017-01-01
Supplement: c7ra09560k1.pdf [file c7ra09560k1.pdf]

**Electronic Supplementary Information for  
A General Synthesis of Abundant Metal Nanoparticles Functionalized Mesoporous  
Graphitized Carbon**

Tao Wang,<sup>a</sup> Yan Sun,<sup>a</sup> Ang Li,<sup>a</sup> Yali Ma,<sup>a</sup> Danyang Feng,<sup>a</sup> Youxing Fang,<sup>b</sup> Yunling Liu,<sup>a</sup> Qisheng Huo,<sup>a</sup>  
Zhen-An Qiao<sup>\*,a</sup> and Sheng Dai<sup>c</sup>

<sup>a</sup> State Key Laboratory of Inorganic Synthesis and Preparative Chemistry, Jilin University, Changchun,  
Jilin 130012, China

Email: [qiaozhenan@jlu.edu.cn](mailto:qiaozhenan@jlu.edu.cn)

<sup>b</sup> State Key Laboratory of Electroanalytical Chemistry, Changchun Institute of Applied Chemistry,  
Chinese Academy of Science, 5625 Renmin Street, Changchun, Jilin 130022, China

<sup>c</sup> Chemical Sciences Division, Oak Ridge National Laboratory, Oak Ridge, TN 37831, USA

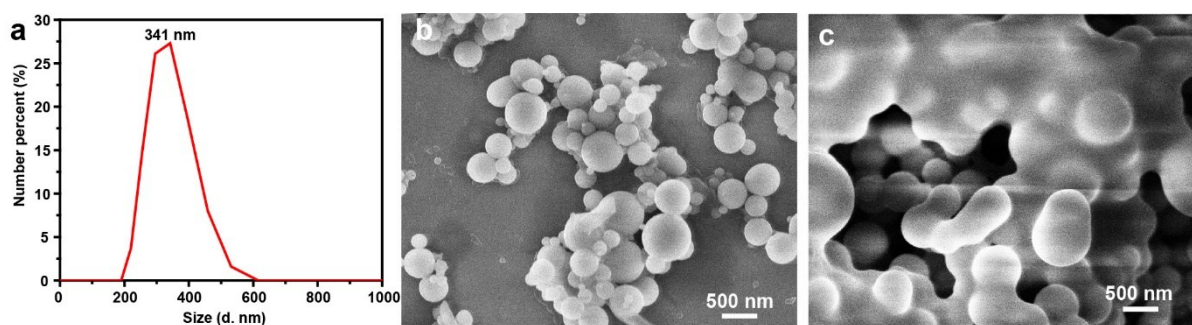

**Fig. S1** a) Hydrodynamic diameters of Fe-GA nanospheres in mother liquor measured by DLS. b) SEM image of fresh Fe-GA nanospheres. c) SEM image of Fe-GA after one day exposed to the air.

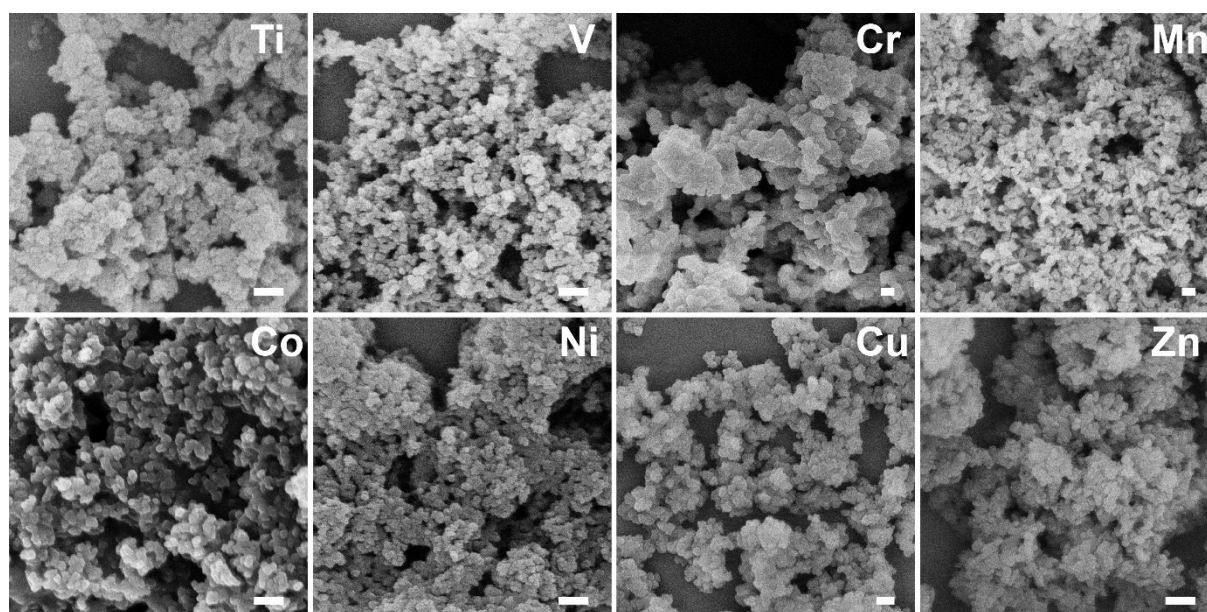

**Fig. S2** SEM images of X-GR. The scale bars are 200 nm.

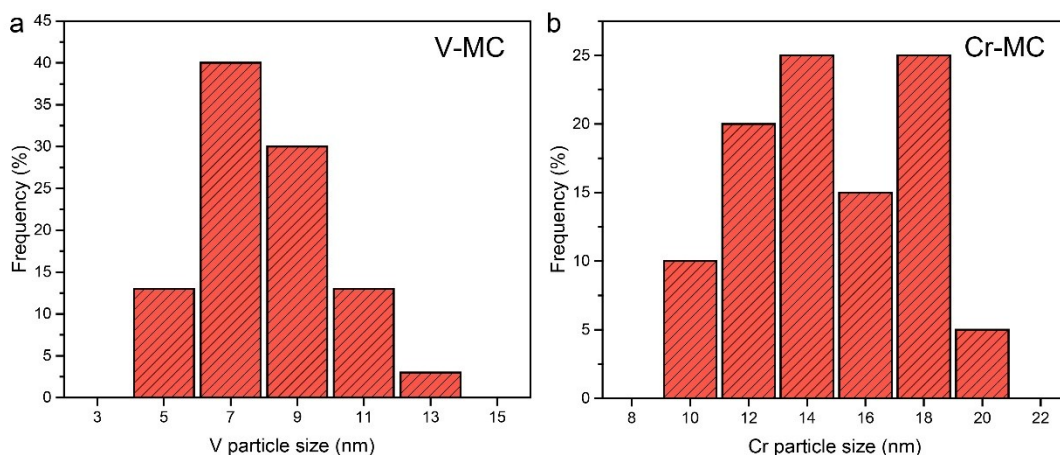

**Fig. S3** a) V particle size distribution in V-MC. b) Cr particle size distribution in Cr-MC.

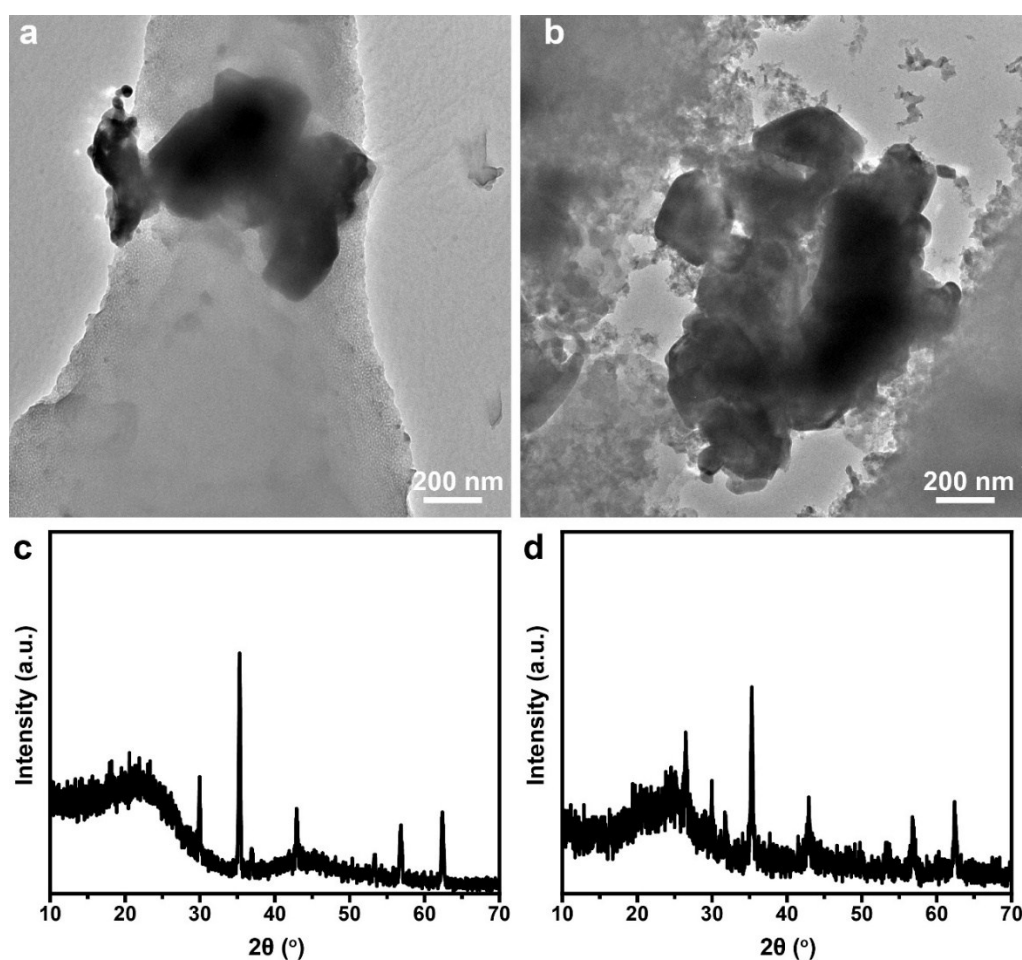

**Fig. S4** TEM images of typical mesoporous carbon (a) and commercial activated carbon (b) with Fe content about 10 wt%. XRD patterns of typical mesoporous carbon (c) and commercial activated carbon (d) with Fe content about 10 wt%.

The typical mesoporous carbon with  $S_{\text{BET}}$  about  $600 \text{ m}^2 \text{ g}^{-1}$  was synthesized according to our previous work.<sup>[S1]</sup> The commercial activated carbon with  $S_{\text{BET}}$  about  $800 \text{ m}^2 \text{ g}^{-1}$  was purchased from Beijing Chemical Works.

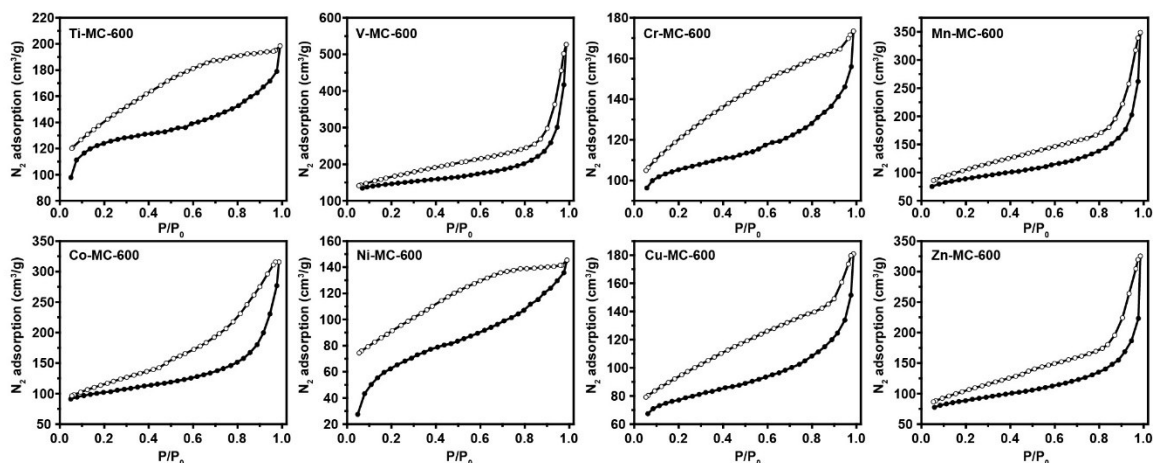

Fig. S5 N<sub>2</sub> adsorption-desorption isotherms of X-MC-600 at 77 K.

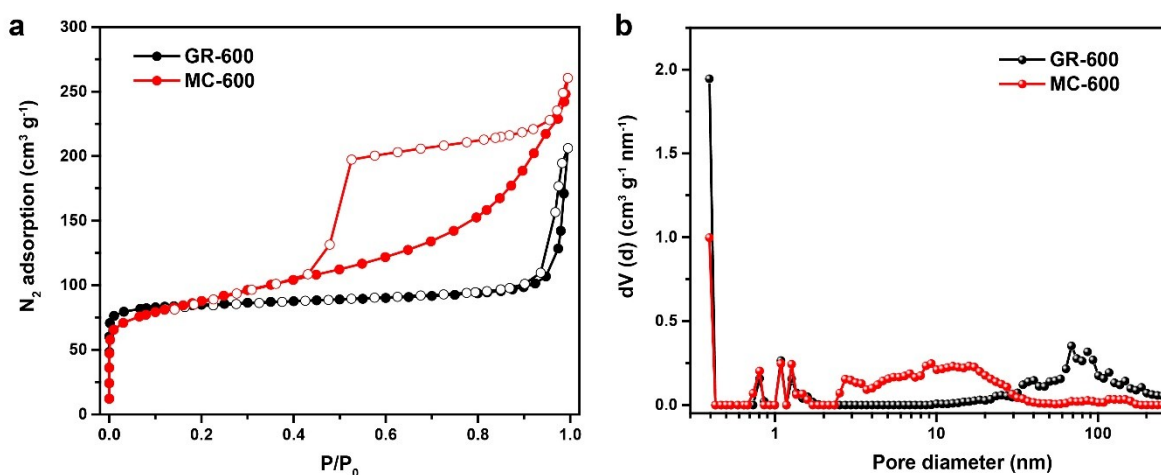

Fig. S6 a) N<sub>2</sub> adsorption-desorption isotherms of Fe-MC-x at 77 K; b) Pore size distribution analysis for GR-600 and MC-600 according to NLDFT model.

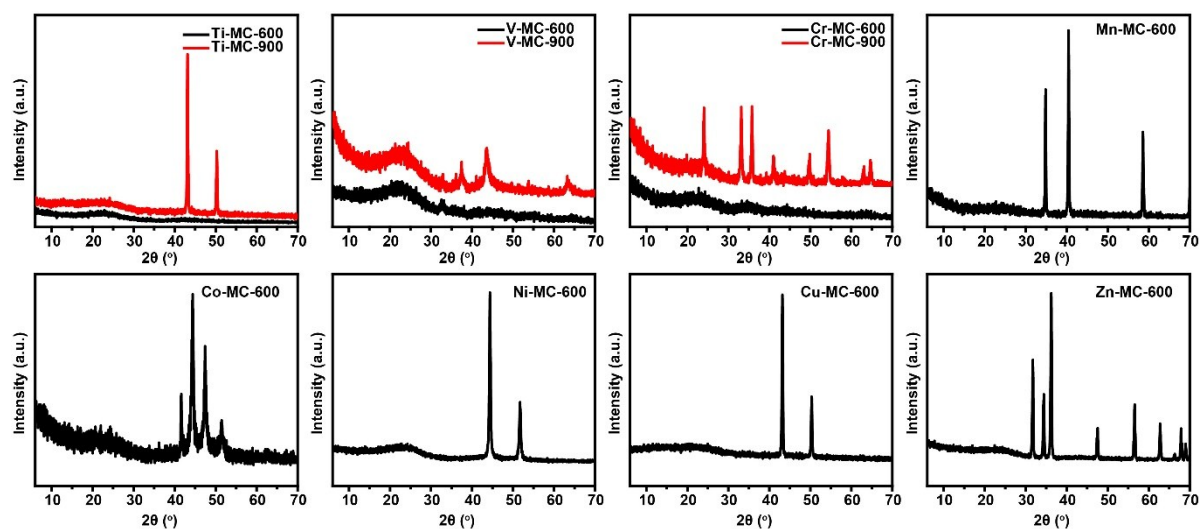

Fig. S7 PXRD patterns of X-MC-x.



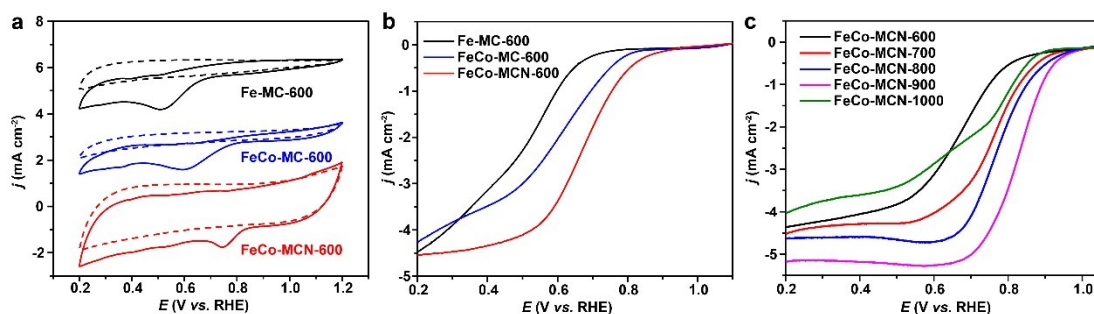

**Fig. S8** a) CV curves of Fe-MC-600, FeCo-MC-600 and FeCo-MCN-600 in  $N_2$ -saturated and  $O_2$ -saturated 0.1 M KOH solution with a sweep rate of  $50 \text{ mV s}^{-1}$ . b) LSV curves of Fe-MC-600, FeCo-MC-600 and FeCo-MCN-600 in  $O_2$ -saturated 0.1 M KOH solution with a sweep rate of  $10 \text{ mV s}^{-1}$ . c) LSV curves of FeCo-MCN-x in  $O_2$ -saturated 0.1 M KOH solution with a sweep rate of  $10 \text{ mV s}^{-1}$ .

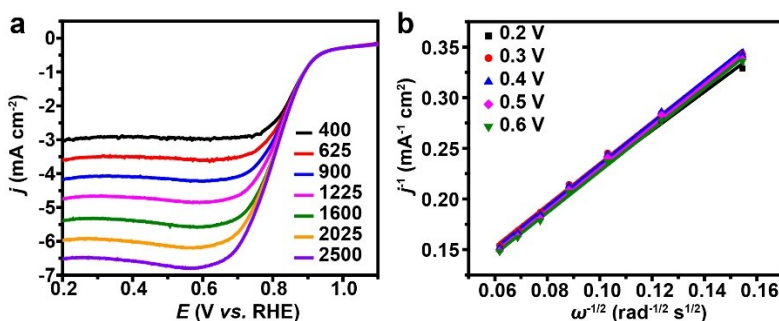

**Fig. S9** a) LSV curves of FeCo-MCN-900 in  $O_2$ -saturated 0.1 M KOH solution at different rotation speeds ranging from 400 to 2500 rpm. b) Corresponding Koutecky-Levich plots ( $j^{-1}$  versus  $\omega^{-1/2}$ ) at different potentials from the LSV shown in panel a.

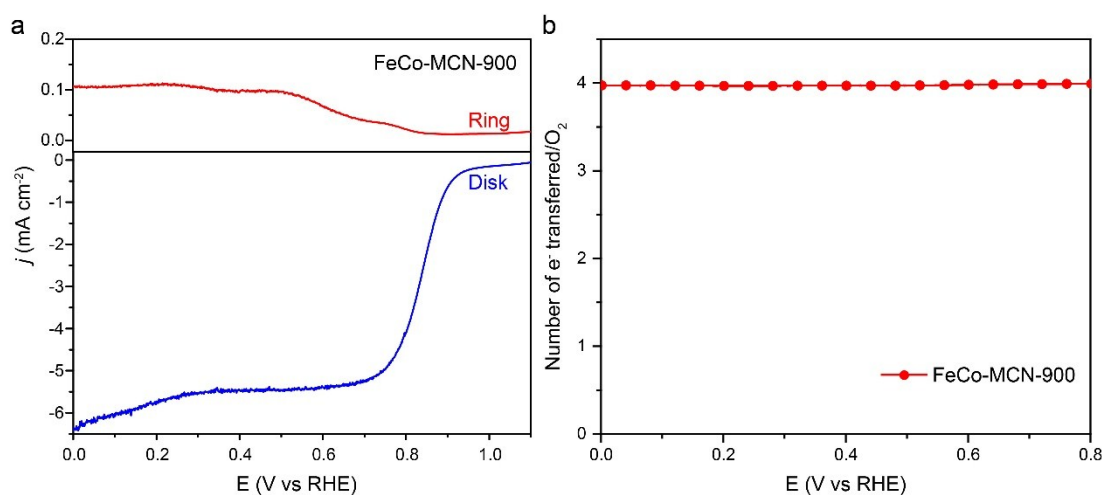

**Fig. S10** a) RRDE measurement of FeCo-MCN-900. b) The number of electrons transferred per  $O_2$  as a function of potential for FeCo-MCN-900.

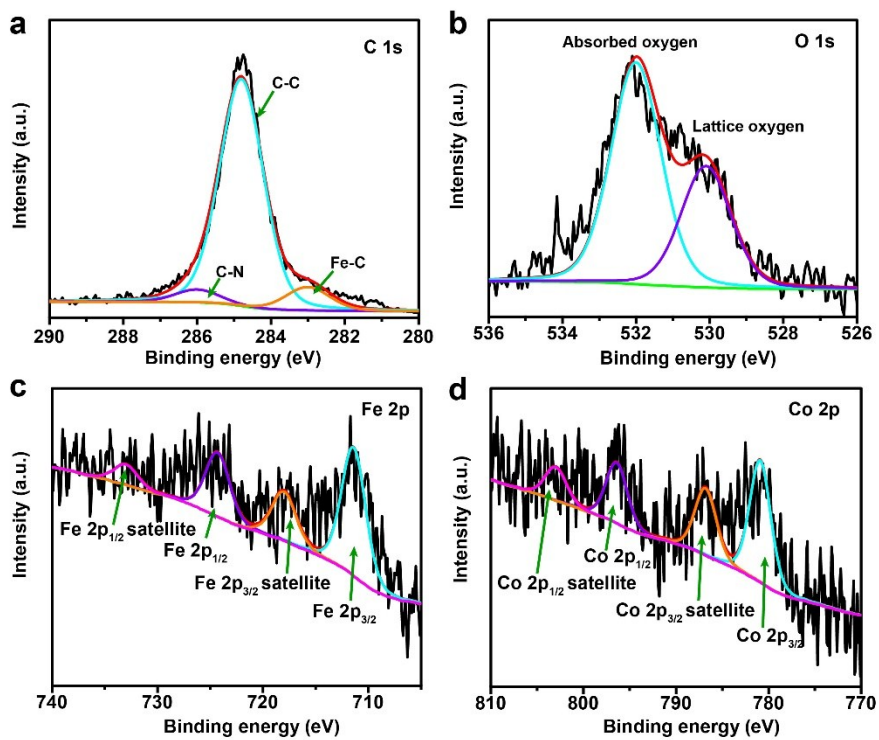

**Fig. S11** (a) C 1s, (b) O 1s, (c) Fe 2p and (d) Co 2p XPS spectra of FeCo-MCN-900.

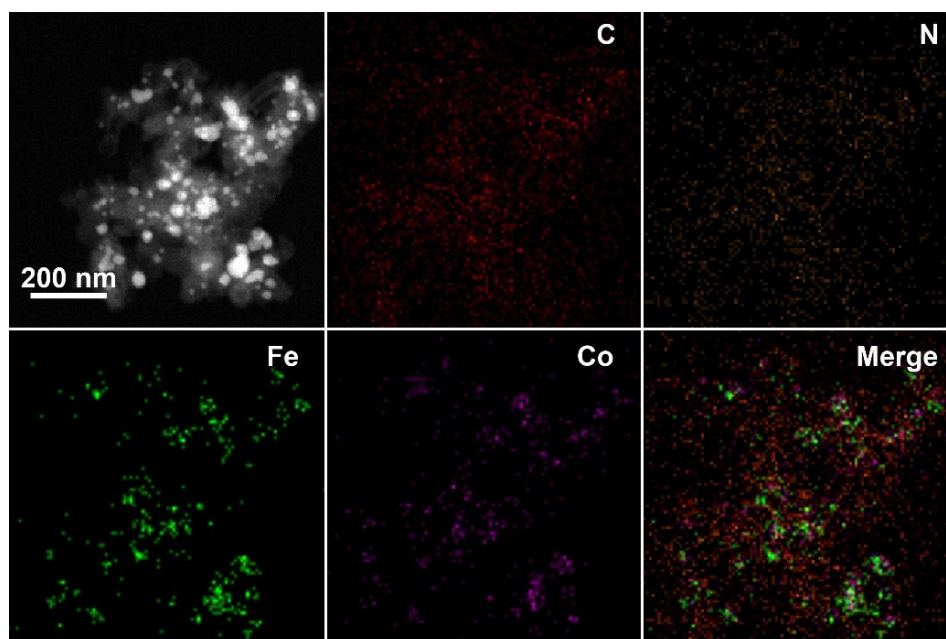

**Fig. S12** Elemental mappings of FeCo-MCN-900.

**Table S1** Porosity parameters of X-MC-x.

| Sample    | $S_{\text{BET}}$ ( $\text{m}^2 \text{g}^{-1}$ ) <sup>[a]</sup> | $V_{\text{total}}$ ( $\text{cm}^3 \text{g}^{-1}$ ) <sup>[b]</sup> | $V_{\text{meso}}$ ( $\text{cm}^3 \text{g}^{-1}$ ) <sup>[c]</sup> | $S_{\text{meso}}$ ( $\text{m}^2 \text{g}^{-1}$ ) <sup>[d]</sup> |
|-----------|----------------------------------------------------------------|-------------------------------------------------------------------|------------------------------------------------------------------|-----------------------------------------------------------------|
| Fe-MC-600 | 272                                                            | 0.270                                                             | 0.208                                                            | 149                                                             |
| Fe-MC-700 | 255                                                            | 0.331                                                             | 0.289                                                            | 170                                                             |
| Fe-MC-800 | 235                                                            | 0.316                                                             | 0.277                                                            | 158                                                             |
| MC-600    | 342                                                            | 0.423                                                             | 0.369                                                            | 238                                                             |
| GR-600    | 334                                                            | 0.315                                                             | 0.181                                                            | 78                                                              |
| Ti-MC-600 | 399                                                            | 0.307                                                             | 0.141                                                            | 65                                                              |
| V-MC-600  | 462                                                            | 0.815                                                             | 0.645                                                            | 133                                                             |
| Cr-MC-600 | 328                                                            | 0.268                                                             | 0.129                                                            | 57                                                              |
| Mn-MC-600 | 292                                                            | 0.540                                                             | 0.457                                                            | 127                                                             |
| Co-MC-600 | 329                                                            | 0.488                                                             | 0.384                                                            | 124                                                             |
| Ni-MC-600 | 247                                                            | 0.225                                                             | 0.188                                                            | 146                                                             |
| Cu-MC-600 | 248                                                            | 0.280                                                             | 0.196                                                            | 83                                                              |
| Zn-MC-600 | 289                                                            | 0.503                                                             | 0.418                                                            | 123                                                             |

[a]  $S_{\text{BET}}$  is the BET specific surface area obtained from the adsorption data in the  $P/P_0$  range from 0.05 to 0.3;

[b]  $V_{\text{total}}$  is the single point pore volume calculated from adsorption isotherm at  $P/P_0 = 0.985$ ;

[c]  $V_{\text{meso}}$  is the cumulative pore volume calculated in the range of pore widths above 2 nm;

[d]  $S_{\text{meso}}$  is the cumulative surface area calculated in the range of pore widths above 2 nm.

#### ***Supply Reference***

[S1] C. Liang, S. Dai, *J. Am. Chem. Soc.* **2006**, *128*, 5316.
